# Supplementary material for: Prevalence and factors associated with Blood Exposure Accidents Among Healthcare Workers in Kalemie, Democratic Republic of Congo, March 2024: A Cross-Sectional Study
Source: Research Square preprint supplement (doi:10.21203/rs.3.rs-7616605/v1), 2025-11-19
Supplement: Supplementary file 1 [file 7e01d44f948e9397a6d52426.pdf]

## Data collection tool

### Section 0: Identification

| No. | Item                                                               | Response Format / Instruction                            |
|-----|--------------------------------------------------------------------|----------------------------------------------------------|
| 0   | Do you agree to participate in the survey?                         | Yes = 1 / No = 0 → If No, do not proceed with the survey |
| 1   | Has the respondent worked at this facility for at least 12 months? | Yes = 1 / No = 0 → If No, exclude from the survey        |
| 2   | Respondent identification number                                   | /// ____/                                                |
| 3   | Respondent's residential commune                                   | _____                                                    |
| 4   | Survey site                                                        | _____                                                    |
| 5   | Date of survey                                                     | /// ____/                                                |
| 6   | Start time                                                         | ///                                                      |

### Section 1: Health Facility Organization

*(To be completed by the facility manager only)*

| No.    | Question                                                                    | Response Options                                                                                                                             |
|--------|-----------------------------------------------------------------------------|----------------------------------------------------------------------------------------------------------------------------------------------|
| Q100   | Name of the health facility                                                 | Open field                                                                                                                                   |
| Q101   | Ownership type                                                              | Public = 1 / Parastatal = 2                                                                                                                  |
| Q102   | Health zone                                                                 | Kalemie = 1 / Nyemba = 2                                                                                                                     |
| Q104   | Health area                                                                 | Open field                                                                                                                                   |
| Q105   | Facility type                                                               | General Referral Hospital = 1 / Referral Health Center = 2 / Medical Center = 3 / University Clinic = 4 / Polyclinic = 5 / Health Center = 6 |
| Q106   | Do you conduct on-the-job training on IPC/SP/BEA?                           | Yes = 1 / No = 2                                                                                                                             |
| Q107   | Does your facility have PPE available? (Verify stock)                       | Yes = 1 / No = 2                                                                                                                             |
| Q108   | If yes, which items are available? (Multiple answers allowed; verify stock) | See sub-items below                                                                                                                          |
| Q113.a | Apron                                                                       | Yes / No                                                                                                                                     |
| Q113.b | Gloves                                                                      | Yes / No                                                                                                                                     |
| Q113.c | Head cover                                                                  | Yes / No                                                                                                                                     |
| Q113.d | Boots/shoes                                                                 | Yes / No                                                                                                                                     |
| Q113.e | Eye protection / goggles                                                    | Yes / No                                                                                                                                     |
| Q113.f | Mask                                                                        | Yes / No                                                                                                                                     |
| Q113.g | Examination gloves                                                          | Yes / No                                                                                                                                     |
| Q113.i | Gown                                                                        | Yes / No                                                                                                                                     |
| Q109   | Is there at least one waste bin in each room of your service?               | Yes = 1 / No = 2                                                                                                                             |

|      |                           |                                                                                                               |
|------|---------------------------|---------------------------------------------------------------------------------------------------------------|
| Q110 | If yes, what type of bin? | Metal pedal bin = 1 / Plastic pedal bin = 2 / Plastic bucket = 3 / Safety box = 4 / Cardboard = 5 / Other = 6 |
|------|---------------------------|---------------------------------------------------------------------------------------------------------------|

## Section 2: Sociodemographic Characteristics of the Respondent

| No.  | Item                                    | Response Format / Options                                                                                                                         |
|------|-----------------------------------------|---------------------------------------------------------------------------------------------------------------------------------------------------|
| Q200 | Respondent's sex                        | Male = 1 / Female = 0                                                                                                                             |
| Q201 | Date of birth                           | DD / MM / YYYY                                                                                                                                    |
| Q202 | Age at last birthday                    | Age in completed years                                                                                                                            |
| Q203 | Professional qualification              | Physician = 1 / Nurse = 2 / Laboratory Technician or Biologist = 3 / Midwife = 4 / Surgical Assistant = 5                                         |
| Q204 | Department of work                      | Surgery = 1 / Obstetrics-Gynecology = 2 / Pediatrics = 3 / Internal Medicine = 4 / Laboratory = 5 / Other (specify) = 6                           |
| Q205 | Years of professional experience        | Open field                                                                                                                                        |
| Q206 | Average number of working hours per day | < 8 hours = 1 / ≥ 8 hours = 2                                                                                                                     |
| Q207 | Religion (select one)                   | Catholic = 1 / Protestant = 2 / Revival Church = 3 / Muslim = 4 / Kimbanguist = 5 / Jehovah's Witness = 6 / No religion = 7 / Other (specify) = 8 |
| Q208 | Marital status (select one)             | Single = 1 / Married or in union = 2 / Divorced or separated = 3 / Widowed = 4                                                                    |

## Section 3: Knowledge, Attitudes, and Practices Regarding Blood Exposure Accidents (BEAs)

### Knowledge and Attitudes

| No.  | Item                                                                     | Response Format / Options                                                                                                                                                                                                                                                   |
|------|--------------------------------------------------------------------------|-----------------------------------------------------------------------------------------------------------------------------------------------------------------------------------------------------------------------------------------------------------------------------|
| Q200 | Have you ever heard of blood exposure accidents (BEAs)?                  | Yes = 1 / No = 0                                                                                                                                                                                                                                                            |
| Q201 | If yes, where did you first hear about it?<br>(Multiple answers allowed) | Radio = 1 / Television = 2 / Administrative memo = 3 / Social media = 4 / Training = 5 / Poster = 6 / School or university = 7 / Friend or colleague = 8 / Other (specify) = 9                                                                                              |
| Q202 | What do you understand by a blood exposure accident?                     | Accidental percutaneous or mucocutaneous contact with blood = 1 / Contact with biological fluids (e.g., genital secretions, CSF, synovial, pleural, peritoneal, pericardial, amniotic) with or without contaminated blood = 2 / Occurs via needle stick, cut, or splash = 3 |
| Q203 | How serious do you consider BEAs?                                        | Very serious = 1 / Serious = 2 / Less serious = 3 / Not serious = 4 / Don't know = 5                                                                                                                                                                                        |

|      |                                                                                            |                                                                                                                                                                                                                                                                                                                                     |
|------|--------------------------------------------------------------------------------------------|-------------------------------------------------------------------------------------------------------------------------------------------------------------------------------------------------------------------------------------------------------------------------------------------------------------------------------------|
| Q204 | How do BEAs occur? ( <i>Multiple answers allowed</i> )                                     | Needle stick with used needle = 1 / Injury with used blade = 2 / Splash of biological fluids on mucosa = 3 / Splash on broken skin = 4 / Other (specify) = 5                                                                                                                                                                        |
| Q205 | Which objects are commonly involved in BEAs?                                               | Suture needle = 1 / Hollow needle (syringe) = 2 / Blade = 3 / Catheter = 4 / Surgical equipment = 5 / Abandoned needle = 6 / Other (specify) = 7                                                                                                                                                                                    |
| Q206 | Which pathogens are commonly transmitted through BEAs? ( <i>Multiple answers allowed</i> ) | HIV = 1 / HBV = 2 / HCV = 3 / Other (specify) = 4                                                                                                                                                                                                                                                                                   |
| Q207 | Which procedures carry risk for BEAs? ( <i>Multiple answers allowed</i> )                  | Suturing = 1 / Intramuscular injection = 2 / Blood sampling = 3 / Needle insertion/removal = 4 / Recapping used needle = 5 / Equipment transport = 6 / Handling medical waste bin = 7 / Handling non-medical waste = 8 / Cleaning instruments or hospital beds = 9 / Surgical procedure = 10 / Puncture = 11 / Other (specify) = 12 |
| Q208 | What are the first aid steps after a BEA?                                                  | Wash with soap and water = 1 / Apply pressure to wound = 2 / Wash with water only = 3 / Wash with saline = 4 / Disinfect with antiseptic = 5 / Apply pressure to make wound bleed = 6                                                                                                                                               |
| Q209 | Do you believe hepatitis B vaccination provides protection?                                | Strongly agree = 1 / Agree = 2 / Somewhat agree = 3 / Disagree = 4 / Don't know = 99                                                                                                                                                                                                                                                |
| Q210 | Do you believe BEAs should be reported?                                                    | Strongly agree = 1 / Agree = 2 / Somewhat agree = 3 / Disagree = 4 / Don't know = 99                                                                                                                                                                                                                                                |
| Q211 | Is it important to know the patient's serological status after a BEA?                      | Strongly agree = 1 / Agree = 2 / Somewhat agree = 3 / Disagree = 4 / Don't know = 99                                                                                                                                                                                                                                                |
| Q212 | Is it important to check your own serological status after a BEA?                          | Strongly agree = 1 / Agree = 2 / Somewhat agree = 3 / Disagree = 4 / Don't know = 99                                                                                                                                                                                                                                                |
| Q213 | Do you believe PPE use protects against BEAs?                                              | Strongly agree = 1 / Agree = 2 / Somewhat agree = 3 / Disagree = 4 / Don't know = 99                                                                                                                                                                                                                                                |

#### Section 4: Practices Regarding Blood Exposure Accidents

| No.  | Item                                                                                               | Response Format / Options                                                              |
|------|----------------------------------------------------------------------------------------------------|----------------------------------------------------------------------------------------|
| Q213 | Do you apply standard precautions for blood and body fluids at work?                               | Always = 1 / Usually = 2 / Occasionally = 3 / Rarely = 4 / Never = 5 / Don't know = 99 |
| Q215 | Do you wash your hands before examining a patient?                                                 | Same scale as above                                                                    |
| Q216 | Do you recap needles immediately after use?                                                        | Same scale as above                                                                    |
| Q217 | Do you disinfect blood spills before cleaning surfaces?                                            | Same scale as above                                                                    |
| Q218 | Do you perform mouth pipetting of blood?                                                           | Same scale as above                                                                    |
| Q219 | Have you ever considered initiating post-exposure prophylaxis after a needle-stick injury at work? | Yes = 1 / No = 0 / Don't know = 99                                                     |

|      |                                            |                                                                                              |
|------|--------------------------------------------|----------------------------------------------------------------------------------------------|
| Q220 | Are PPEs available in your department?     | Always = 1 / Usually = 2 /<br>Occasionally = 3 / Rarely = 4 / Never<br>= 5 / Don't know = 99 |
| Q220 | Do you wear personal protective equipment? | Same scale as above                                                                          |

If PPE is worn, which items are used? *(Multiple answers allowed)*

| Item Code | PPE Item                 | Response Options |
|-----------|--------------------------|------------------|
| 220.1     | Apron                    | Yes / No         |
| 220.2     | Gloves                   | Yes / No         |
| 220.3     | Head cover               | Yes / No         |
| 220.4     | Boots/shoes              | Yes / No         |
| 220.5     | Eye protection / goggles | Yes / No         |
| 220.6     | Mask                     | Yes / No         |
| 220.7     | Examination gloves       | Yes / No         |
| 220.8     | Gown                     | Yes / No         |
| 220.9     | Other (specify)          | Open field       |

If PPE is not worn, why? *(Multiple answers allowed)*

| Item Code | Reason                 | Response Options |
|-----------|------------------------|------------------|
| 221.1     | Difficult to work with | Yes / No         |
| 221.2     | Not always necessary   | Yes / No         |
| 221.3     | Uncomfortable          | Yes / No         |
| 221.4     | Not available          | Yes / No         |
| 221.5     | Out of stock           | Yes / No         |
| 221.6     | Other (specify)        | Open field       |

Reuse of Syringes and Needles

| No.  | Item                               | Response Format / Options |
|------|------------------------------------|---------------------------|
| Q224 | Do you reuse syringes and needles? | Yes = 1 / No = 0          |

If Yes, what are the reasons? *(Multiple answers allowed)*

| Item Code | Reason            | Response Options |
|-----------|-------------------|------------------|
| 225.a     | Supply shortage   | Yes / No         |
| 225.b     | Lack of knowledge | Yes / No         |
| 225.c     | Inattention       | Yes / No         |
| 225.d     | Cost-saving       | Yes / No         |
| 225.e     | Other (specify)   | Open field       |

|                                                                               |
|-------------------------------------------------------------------------------|
| Q226   Do you use waste bins for healthcare-related waste?   Yes = 1 / No = 0 |
|-------------------------------------------------------------------------------|

## Section 5: History of Blood Exposure Accidents (BEAs)

| No. | Item | Response Format / Options |
|-----|------|---------------------------|
|-----|------|---------------------------|

|      |                                                                                                                             |                                                                                                                                                                                                                                                                                                                                    |
|------|-----------------------------------------------------------------------------------------------------------------------------|------------------------------------------------------------------------------------------------------------------------------------------------------------------------------------------------------------------------------------------------------------------------------------------------------------------------------------|
| Q300 | Have you ever come into contact with blood, stool, urine, or other body fluids during your work (on broken skin or mucosa)? | Yes = 1 / No = 0                                                                                                                                                                                                                                                                                                                   |
| Q301 | Have you had such contact in the past year?                                                                                 | Yes = 1 / No = 0 → If No, end of survey                                                                                                                                                                                                                                                                                            |
| Q302 | If yes, approximately how many times?                                                                                       | Open field                                                                                                                                                                                                                                                                                                                         |
| Q303 | What was the cause of the last exposure?                                                                                    | Lack of attention = 1 / Limited workspace = 2 / Lack of safety devices = 3 / Work stress or overload = 4 / Unexpected patient movement = 5 / Lack of practical experience = 6 / Other = 7                                                                                                                                          |
| Q304 | Where did the last exposure occur?                                                                                          | Patient room = 1 / Laboratory = 2 / Operating room = 3 / ICU = 4 / Emergency room = 5 / Waste area = 6 / Consultation room = 7 / Treatment room = 8 / Vaccination session = 9 / Other (specify) = 10                                                                                                                               |
| Q305 | What type of exposure occurred during the last BEA? ( <i>Multiple answers allowed</i> )                                     | Percutaneous: Finger / Hand / Arm / Foot; Mucosal: Mouth / Eyes                                                                                                                                                                                                                                                                    |
| Q306 | What was the mechanism of the last exposure?                                                                                | Needle stick = 1 / Blade injury = 2 / Splash on mucosa = 3 / Splash on broken skin = 4 / Other (specify) = 5                                                                                                                                                                                                                       |
| Q307 | What object was involved in the last exposure?                                                                              | Suture needle = 1 / Hollow needle (syringe) = 2 / Blade = 3 / Catheter = 4 / Surgical equipment = 5 / Abandoned needle = 6 / Other (specify) = 7                                                                                                                                                                                   |
| Q308 | What procedure led to the last exposure?                                                                                    | Suturing = 1 / Intramuscular injection = 2 / Blood sampling = 3 / Needle insertion/removal = 4 / Recapping used needle = 5 / Equipment transport = 6 / Handling medical waste = 7 / Handling non-medical waste = 8 / Cleaning instruments or beds = 9 / Surgery = 10 / Puncture = 11 / Mouth pipetting = 12 / Other (specify) = 13 |
| Q309 | Were you wearing PPE during the last BEA?                                                                                   | Yes = 1 / No = 2                                                                                                                                                                                                                                                                                                                   |
| Q310 | What first aid measures did you apply?                                                                                      | Wash with soap and water = 1 / Apply pressure = 2 / Wash with water only = 3 / Wash with saline = 4 / Disinfect with antiseptic = 5 / Apply pressure to make wound bleed = 6                                                                                                                                                       |
| Q311 | Did you report and seek consultation after the last BEA?                                                                    | Yes = 1 / No = 0                                                                                                                                                                                                                                                                                                                   |
| Q312 | If yes, how soon after the incident?                                                                                        | < 1 hour = 1 / Within 48 hours = 2 / After 48 hours = 3                                                                                                                                                                                                                                                                            |

If No to Q311, why not? (*Multiple answers allowed*)

| Reason                           | Response Options |
|----------------------------------|------------------|
| Unaware of procedures            | Yes / No         |
| Considered the incident low-risk | Yes / No         |
| Lack of time                     | Yes / No         |
| Patient's serology was negative  | Yes / No         |

| Q315 | Did you check your own serological status after the exposure? | Yes = 1 / No = 0 |

| Q316 | What was the source patient's serological status? | HIV+ = 1 / HBV+ = 2 / HCV+ = 3 / Seronegative = 4 / Unknown = 5 |

| Q317 | Did you receive any treatment after the last BEA? | Antibiotics = 1 / Antiretrovirals = 2 / Immunoglobulin = 3 / No treatment = 4 |

| Q318 | What was the outcome of the last BEA? | Favorable = 1 / Unfavorable = 2 / Don't know = 99 |

| Q319 | Are you vaccinated against hepatitis B? | Yes = 1 / No = 0 / Don't know = 99 |

| Q320 | If No, why not? | Do not want to be vaccinated = 1 / Vaccine unavailable = 2 / Lack of time = 3 / Other = 4 |

| Q321 | Are PPEs available in your department? | Yes = 1 / No = 0 / Don't know = 99 |
